# Supplementary material for: Suicide among Cancer Patients: Current Knowledge and Directions for Observational Research
Source: MDPI journal article supplement (doi:10.3390/jcm12206563), 2023-10-16
Supplement: s1 [file s1]

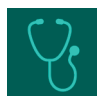

**Table S1.** Summary of Observational Studies on Cancer and Suicide.

| Last Name of First Author | Publication year | Aims/Objectives                                                                                                                                                                                                                                                                                  | Data-base Used                            | Years Analyzed | Study population                   | Comparisons                   | Geographic Regions Included | Stratifications/Covariates                                  | Outcome Measures        | Quantitative Outcomes       | Main Results                                                                                                                    |
|---------------------------|------------------|--------------------------------------------------------------------------------------------------------------------------------------------------------------------------------------------------------------------------------------------------------------------------------------------------|-------------------------------------------|----------------|------------------------------------|-------------------------------|-----------------------------|-------------------------------------------------------------|-------------------------|-----------------------------|---------------------------------------------------------------------------------------------------------------------------------|
| Nasseri [66]              | 2012             | Calculate and compare the age-adjusted rates and standardized mortality ratios for suicide in cancer patients by sex and race/ethnicity, and to use age-adjusted rates to describe suicide patterns within cancer patient population by sex, organ site, stage at diagnosis, and marital status. | California Cancer Registry (part of SEER) | 1997-2006      | Patients diagnosed with cancer     | California general population | California                  | Sex; Race; Other: Cancer site, marital status, cancer stage | Age-adjusted rates, SMR | Rate Ratio = 2.5, SMR = 2.0 | Cancer patients are at higher risk of suicide than the general population                                                       |
| Komic [67]                | 2017             | Assess the incidence of suicide among patients with melanoma of the skin, and to identify demographic, clinical, and pathologic factors associated with suicide in this patient population.                                                                                                      | SEER                                      | 1988-2013      | Patients with melanoma of the skin | US general population         | United States               | Sex; Age; Race                                              | OR, SMR                 | Overall not reported        | Patients with malignant melanoma were found to have a statistically higher risk of suicide compared with the general population |

|            |      |                                                                                                                                                                                                                                                                                                                                                                                     |       |           |                                                                                                  |                       |               |                                                                                                                                 |                         |                                       |                                                                                                                                                                                                                                                                                                                                                                        |
|------------|------|-------------------------------------------------------------------------------------------------------------------------------------------------------------------------------------------------------------------------------------------------------------------------------------------------------------------------------------------------------------------------------------|-------|-----------|--------------------------------------------------------------------------------------------------|-----------------------|---------------|---------------------------------------------------------------------------------------------------------------------------------|-------------------------|---------------------------------------|------------------------------------------------------------------------------------------------------------------------------------------------------------------------------------------------------------------------------------------------------------------------------------------------------------------------------------------------------------------------|
| Walsh [11] | 2018 | Examine suicide incidence and associated factors in thyroid cancer patients                                                                                                                                                                                                                                                                                                         | SEER  | 1973-2013 | Patients with thyroid cancers                                                                    | US general population | United States | Sex; Age; Race; Time; Other: Income, marital status, stage at diagnosis, primary site, treatment received, tumor histopathology | SMR, OR                 | Overall SMR = 0.59, 95% CI: 0.50-0.69 | Female and White patients with thyroid cancer are more likely to commit suicide than the demographically matched general US population.                                                                                                                                                                                                                                |
| Choi [68]  | 2019 | Examine (1) how decedents with physical health problems recorded as a suicide precipitant differ from those whose health problems were not recorded as a precipitant on depressed mood and other sociodemographic factors and suicide means, and (2) frequently mentioned physical health problems and/or related concerns in coroner/medical examiners and law enforcement reports | NVDRS | 2005-2014 | All suicide decedents between 2005 and 2014, specifically focused towards those aged 65 or older | N/A                   | United States | Sex; Age; Race; Time; Other: Precipitating factors, suicide method                                                              | Adjusted OR with 95% CI | Overall not reported                  | One-half of suicide decedents aged 65 or older (and 60% among decedents aged 85+) had physical health problems recorded as having directly contributed to their suicide. Those older adults were more likely to have been suffering from depression and to have expressed their suicidal intent than those without physical health problems recorded as a precipitant. |

|               |      |                                                                                                                                                                 |      |           |                                                                                           |                    |               |                                                                                                                                                     |                                                                                                                                           |                                                                                        |                                                                                                                                                                                          |
|---------------|------|-----------------------------------------------------------------------------------------------------------------------------------------------------------------|------|-----------|-------------------------------------------------------------------------------------------|--------------------|---------------|-----------------------------------------------------------------------------------------------------------------------------------------------------|-------------------------------------------------------------------------------------------------------------------------------------------|----------------------------------------------------------------------------------------|------------------------------------------------------------------------------------------------------------------------------------------------------------------------------------------|
| Yang [32]     | 2020 | Analyze sociological risk factors for suicide death in leukemia patients                                                                                        | SEER | 1973-2015 | Leukemia patients older than 18 years                                                     | N/A                | United States | Sex; Age; Race; Time; Geography; Other: Marital status at diagnosis, poverty level, educational status, unemployment status, income, smoking status | OR, univariate and multivariate logistic regression analysis                                                                              | Overall not reported                                                                   | Younger age at diagnosis, being male, having at least a bachelor's degree, and being from California significantly increased the risk of suicide death.                                  |
| Shivarov [69] | 2022 | Assess whether cancer diagnosis interacts with the seasonality of suicides                                                                                      | SEER | 1973-2016 | Patients with primary malignancies and documented cause of death Suicide reported in SEER | N/A                | United States | Sex; Age; Race; Time; Geography; Other: Main cancer subtypes                                                                                        | Cosinor model                                                                                                                             | P value cosine term = $1.68 \times 10^{-7}$ P value sine term = $3.63 \times 10^{-10}$ | There was a significant peak in suicides among cancer patients in May. This aligns with what is found in the general US population.                                                      |
| Beard [70]    | 2013 | Quantify non-testicular cancer causes of death and associated temporal patterns among a large number of men with stage I seminoma in a population-based setting | SEER | 1973-2001 | Men diagnosed with stage I testicular seminoma                                            | 2000 US population | United States | Age; Race; Other: Tumor stage, county education level, receipt of adjuvant radiotherapy                                                             | Overall mortality and mortality from second malignant neoplasm, cardiovascular disease, infection, suicide, cerebrovascular disease, COPD | SMR = 1.45, 95% CI: 1.06- 1.98                                                         | Among patients with stage I testicular seminoma, excess cardiovascular deaths were not observed, but there was excess mortality from second malignant neoplasms, infection, and suicide. |

|               |      |                                                                                                                                                                                   |      |           |                                                      |                                         |               |                                                                                          |                                                             |                                                                                                                              |                                                                                                                                                                                                                                                      |
|---------------|------|-----------------------------------------------------------------------------------------------------------------------------------------------------------------------------------|------|-----------|------------------------------------------------------|-----------------------------------------|---------------|------------------------------------------------------------------------------------------|-------------------------------------------------------------|------------------------------------------------------------------------------------------------------------------------------|------------------------------------------------------------------------------------------------------------------------------------------------------------------------------------------------------------------------------------------------------|
| Ward [27]     | 2013 | Describe the risk of suicide among women with invasive gynecologic malignancies compared to women diagnosed with non-gynecologic malignancies                                     | SEER | 1973-2007 | Women with gynecologic malignancies                  | Women with non-gynecologic malignancies | United States | Race; Other: Marital status                                                              | Relative risk ratio for suicide RR = 1.3, 95% CI: 1.1 – 1.5 | Women with gynecologic malignancies were 30% more likely to commit suicide than were women with non-gynecologic malignancies |                                                                                                                                                                                                                                                      |
| Yu [15]       | 2022 | Explore the mortality patterns of contemporary renal cell carcinoma survivors                                                                                                     | SEER | 2004-2015 | Patients diagnosed with renal cell carcinoma         | US general population                   | United States | Sex; Age; Race; Time; Other: Cancer stage, histology, treatment received, marital status | SMR                                                         | Stage IV SMR = 3.46, 95% CI: 2.17-5.24                                                                                       | Non-renal cell carcinoma causes of death account for more than 3/4 of deaths among renal cell carcinoma patients with stage I/II disease. Stage IV patients had an elevated risk of suicide.                                                         |
| Klaassen [13] | 2016 | Evaluate the suicide incidence in patients with bladder cancer and assess the impact of radical cystectomy on suicide rates.                                                      | SEER | 1988-2010 | Patients diagnosed with bladder urothelial carcinoma | US general population                   | United States | Sex; Age; Race; Other: Marital status, tumor stage, treatment received                   | SMR                                                         | SMR = 2.71, 95% CI: 2.02–3.62                                                                                                | A diagnosis of bladder cancer increases the incidence of suicide compared to the general population                                                                                                                                                  |
| Klaassen [14] | 2018 | Identify specific factors, temporal trends and potential geographic differences in patients with bladder cancer. Identify patients at high risk for late suicide after diagnosis. | SEER | 1973-2013 | Patients with bladder urothelial carcinoma           | N/A                                     | United States | Sex; Age; Race; Time; Geography; Other: Treatment received, marital status, cancer stage | HR for suicide, OR for suicide                              | Overall not reported                                                                                                         | Early year of diagnosis, unmarried status, white race, elderly age, male sex, regional stage, living in the Southeast, West, and Midwest US, and not undergoing radical cystectomy are associated with suicidal death among bladder cancer patients. |

|              |      |                                                                                                                                                                                                                                             |      |           |                                                                                                    |                       |               |                                                                            |                                                                      |                                           |                                                                                                                                                                                                                                                                                                                                                                                                 |
|--------------|------|---------------------------------------------------------------------------------------------------------------------------------------------------------------------------------------------------------------------------------------------|------|-----------|----------------------------------------------------------------------------------------------------|-----------------------|---------------|----------------------------------------------------------------------------|----------------------------------------------------------------------|-------------------------------------------|-------------------------------------------------------------------------------------------------------------------------------------------------------------------------------------------------------------------------------------------------------------------------------------------------------------------------------------------------------------------------------------------------|
| Liu [60]     | 2022 | Estimate the suicide risk of patients with cancer, as compared with that of the general US population, depending on various sociodemographic factors and cancer types                                                                       | SEER | 1975-2016 | Patients with cancer                                                                               | US general population | United States | Sex; Age; Race; Time; Other: Tumor stage, Marital status, Insurance status | Absolute excess risk estimates, SMR                                  | SMR = 1.45, 95% CI: 1.42 – 1.49           | Cancer patients in the US experienced a 45% increase in suicide risk when compared with the general population.                                                                                                                                                                                                                                                                                 |
| Massa [19]   | 2017 | Describe the competing causes of mortality in the head and neck squamous cell carcinoma (HNSCC) population, compare mortality rates to the general population, and identify risk factors associated with death from these competing causes. | SEER | 2004-2011 | Patients with primary HNSCC (oral cavity, oropharynx, nasopharynx, hypopharynx, larynx, sinonasal) | US general population | United States | Sex; Age; Race; Other: tumor site, tumor stage                             | Cause of death frequencies, SMR, competing mortality risk regression | Overall not reported                      | HNSCC patients in this study had death rates 11.3 times higher than the general population for competing causes. Chronic obstructive pulmonary disease and cardiovascular disease have high SMRs and also constitute a substantial proportion of deaths. Mortality from chronic liver disease and suicide were particularly elevated, approaching 40 times the rates in the general population. |
| Johnson [59] | 2012 | Characterize suicide risk within the first year of cancer diagnosis to potentially identify a clinically useful window of peak suicide risk                                                                                                 | SEER | 1973-2005 | Individuals at least 20 years old diagnosed with cancer                                            | N/A                   | United States | Sex; Age; Race; Time; Other: Tumor grade, tumor stage, cause of death      | Frequency analysis, one-way ANOVA                                    | 33.2% of suicides occurred within 1 month | Cancer patients have an increased risk of suicide. This risk peaks with the month following diagnosis.                                                                                                                                                                                                                                                                                          |

|                |      |                                                                                                                                                     |                                                 |           |                                                                             |                       |               |                                                                                                                                              |                                                                                       |                            |                                                                                                                                                                                                                                                                                                                                                                                                                                                                                                                                                                                                              |
|----------------|------|-----------------------------------------------------------------------------------------------------------------------------------------------------|-------------------------------------------------|-----------|-----------------------------------------------------------------------------|-----------------------|---------------|----------------------------------------------------------------------------------------------------------------------------------------------|---------------------------------------------------------------------------------------|----------------------------|--------------------------------------------------------------------------------------------------------------------------------------------------------------------------------------------------------------------------------------------------------------------------------------------------------------------------------------------------------------------------------------------------------------------------------------------------------------------------------------------------------------------------------------------------------------------------------------------------------------|
| Zhou [33]      | 2022 | Investigate the incidence, trend and risk factors associated with suicide among patients with malignant intracranial tumors                         | SEER                                            | 1975-2015 | Patients diagnosed between 1975 and 2016 with malignant intracranial tumors | US general population | United States | Sex; Age; Race; Time; Other: Marital status, Urbanization, Socioeconomic status, Pathology, tumor site, first malignancy, treatment received | SMR                                                                                   | 1.90 (95% CI: 1.55 – 2.30) | <p>The suicide mortality among patients with malignant intracranial tumors steadily elevated in the past decades. Male sex, older age, and supratentorial location were significantly associated with risk of suicide, especially within the first year following diagnosis.</p> <p>There were 48 reported oncologic adverse events that occurred between 2013 and 2017, the majority of which were delays in care, followed by chemotherapy errors. Suicide composed 10.5% of the events, all stemming from a lack in coordination of care, education of both the staff and patient, and communication.</p> |
| Aboumrads [71] | 2018 | Identify major areas of safety concern in oncology and to offer suggestions and actions for improvement to prevent similar events from reoccurring. | National Center for Patient Safety RCA database | 2013-2017 | Patients with cancer treated at VA hospitals                                | NA                    | United States | Other: Harmful event type                                                                                                                    | Number (%)                                                                            | 10.5% of events            | <p>The major identifiable risk factor for suicide was male gender. Minor risk factors for suicide included metastases, advanced age, and respiratory as well as head and neck tumors.</p>                                                                                                                                                                                                                                                                                                                                                                                                                    |
| Kendal [34]    | 2012 | Examine factors associated with suicide and accidental deaths among cancer patients                                                                 | SEER                                            | 1973-2007 | Patients with cancer                                                        | N/A                   | United States | Sex; Age; Race; Time; Other: Cancer site, marital status, cancer stage                                                                       | Proportional hazards analysis, cumulative distribution function, risk ratio for death | Overall not reported       | <p>The major identifiable risk factor for suicide was male gender. Minor risk factors for suicide included metastases, advanced age, and respiratory as well as head and neck tumors.</p>                                                                                                                                                                                                                                                                                                                                                                                                                    |

|               |      |                                                                                                                                                          |      |           |                                                                    |                       |               |                                                                                                                                |                                                          |                                                    |                                                                                                                                                                                                                                                                                                                                                                                             |
|---------------|------|----------------------------------------------------------------------------------------------------------------------------------------------------------|------|-----------|--------------------------------------------------------------------|-----------------------|---------------|--------------------------------------------------------------------------------------------------------------------------------|----------------------------------------------------------|----------------------------------------------------|---------------------------------------------------------------------------------------------------------------------------------------------------------------------------------------------------------------------------------------------------------------------------------------------------------------------------------------------------------------------------------------------|
| Yu [35]       | 2020 | Identify potential risk factors related to suicide in leukemia patients                                                                                  | SEER | 1975-2017 | Leukemia patients                                                  | US general population | United States | Age; Race; Time; Geography; Other: Leukemia type, treatment received, primary diseases, household income                       | SMR                                                      | SMR = 2.16, 95% CI: 1.85 – 2.47                    | Older, white, or male patients have a higher risk of suicide compared to the general US population                                                                                                                                                                                                                                                                                          |
| Klaassen [16] | 2015 | Use a population-based cohort to assess the incidence of suicide among patients with genitourinary malignancies compared with the general US population. | SEER | 1988-2010 | Patients with prostate, bladder, kidney, testis, and penile cancer | US general population | United States | Age; Race; Other: Marital status, cancer type, cancer grade, disease stage, treatment received                                 | SMR, OR for factors associated with suicide              | Overall not reported                               | Genitourinary malignancies pose a significant risk of suicide, with the patients at highest risk being those with bladder and kidney cancer. Patients with prostate cancer demonstrated an increased prevalence of suicide with increasing time from diagnosis, and patients with bladder cancer appeared to have the highest incidence of suicide within the first 5 years after diagnosis |
| Wang [72]     | 2022 | Describe the distribution of causes of death in thyroid cancer patients                                                                                  | SEER | 1975-2016 | Thyroid cancer patients with an index thyroid malignancy           | US general population | United States | Sex; Age; Race; Time; Other: Marital status, cancer stage at diagnosis, treatment received, non-cancer and cancer death causes | SMR, cumulative mortality rate, annual percentage change | SMR for non-cancer death = 1.59, 95% CI: 1.56-1.62 | Patients with thyroid carcinoma have a higher risk of non-cancer deaths than the cancer-free population                                                                                                                                                                                                                                                                                     |

|                     |      |                                                                                                                                                                 |      |           |                                                                                                                                                                                                                                  |                       |               |                                                                                                                                             |     |                               |                                                                                                                                                                                                                                                                                                                                                                 |
|---------------------|------|-----------------------------------------------------------------------------------------------------------------------------------------------------------------|------|-----------|----------------------------------------------------------------------------------------------------------------------------------------------------------------------------------------------------------------------------------|-----------------------|---------------|---------------------------------------------------------------------------------------------------------------------------------------------|-----|-------------------------------|-----------------------------------------------------------------------------------------------------------------------------------------------------------------------------------------------------------------------------------------------------------------------------------------------------------------------------------------------------------------|
| Su [39]             | 2022 | Characterize the patterns and risk factors for deaths from suicides and cardiovascular events among patients with multiple primary cancers in the United States | SEER | 1975-2016 | Patients with single or multiple primary cancers, excluding patients diagnosed only by autopsy reports or death certificates and without complete follow-up information, including age at diagnosis, follow-up duration, or race | US general population | United States | Sex; Age; Race; Time; Geography; Other: Median house-hold income, cancer stage, surgery received, number of primary cancers, cause of death | SMR | SMR = 1.89, 95% CI: 1.76-2.02 | Mortality rates from suicide and cardiovascular diseases among patients with multiple primary cancers were significantly higher than those of patients with single primary cancers. In addition, patients with asynchronous multiple primary cancers had a higher risk of suicide and cardiovascular death than those with synchronous multiple primary cancers |
| Osazuwa-Peters [20] | 2018 | Evaluate differences in suicide based on gender and HPV-relatedness in head-and neck cancer patients                                                            | SEER | 1973-2014 | Adult patients with squamous cell carcinoma of the head and neck                                                                                                                                                                 | US general population | United States | Sex; Age; Race; Other: Marital status, cancer stage, number of primary tumors, HPV-relatedness                                              | SMR | Overall not reported          | Male HNC survivors had significantly greater risks of suicide than females.                                                                                                                                                                                                                                                                                     |



|             |      |                                                                                                                                                                                                                                                                                                                                                                                                                                                                                                                                                                                                                                                         |      |           |                                                                        |                                    |               |                                                                                                             |     |                                 |                                                                                                                                                                                                                                                                                                                                                                                               |
|-------------|------|---------------------------------------------------------------------------------------------------------------------------------------------------------------------------------------------------------------------------------------------------------------------------------------------------------------------------------------------------------------------------------------------------------------------------------------------------------------------------------------------------------------------------------------------------------------------------------------------------------------------------------------------------------|------|-----------|------------------------------------------------------------------------|------------------------------------|---------------|-------------------------------------------------------------------------------------------------------------|-----|---------------------------------|-----------------------------------------------------------------------------------------------------------------------------------------------------------------------------------------------------------------------------------------------------------------------------------------------------------------------------------------------------------------------------------------------|
| Weiner [12] | 2021 | (1) Assess contemporary, population-based data for causes of death during prostate cancer survivorship in the United States, (2) relate these causes to time periods after the prostate cancer diagnosis and provide results stratified by tumor stage and patient characteristics, and (3) compare the risk of death for each cause with the risk in the general US population<br>Characterize the suicide rate among women with gynecologic cancer in the US relative to suicide rates among women in the general population, and to identify patient, disease and treatment characteristics that are associated with particularly high suicide rates | SEER | 2000-2016 | Men diagnosed with prostate cancer as their first malignant neoplasm   | US general population              | United States | Sex; Age; Race; Geography; Other: Stage of disease, marital status, treatment modality, income              | SMR | SMR = 0.95, 95% CI: 0.90 – 1.00 | Among men diagnosed with local/regional disease, deaths from non-prostate cancer causes were 4-fold more frequent (83% vs 17%), but these men were overall less likely to die of most non-prostate cancer causes in comparison with the general population. Men with distant disease have an increased risk of death from non-prostate cancer causes, particularly suicide and cardiac death. |
| Mahdi [28]  | 2011 |                                                                                                                                                                                                                                                                                                                                                                                                                                                                                                                                                                                                                                                         | SEER | 1988-2007 | Patients with gynecologic cancer (ovarian, uterine, cervical, vaginal) | Women in the US general population | United States | Age; Race; Time; Other: Cancer site, marital status, cancer stage, treatment received, time since diagnosis | SMR | SMR = 1.4, 95% CI: 1.2 – 1.7    | Younger age at diagnosis, high grade disease, and absence of surgical intervention were associated with higher risk of suicide.                                                                                                                                                                                                                                                               |

|             |      |                                                                                                                                                                                              |      |           |                                                                      |                                                |               |                                                                                                           |                                           |                                |                                                                                                                                                                                                                                                   |
|-------------|------|----------------------------------------------------------------------------------------------------------------------------------------------------------------------------------------------|------|-----------|----------------------------------------------------------------------|------------------------------------------------|---------------|-----------------------------------------------------------------------------------------------------------|-------------------------------------------|--------------------------------|---------------------------------------------------------------------------------------------------------------------------------------------------------------------------------------------------------------------------------------------------|
| Alanee [73] | 2012 | Determine mortality rates due to suicide in testis cancer patients, and to identify patient and disease characteristics associated with increased risk of suicide                            | SEER | 1995-2008 | Patients with testis cancer                                          | Standardized U.S. population in 2005 age 25-44 | United States | Age; Race; Time; Other: Cancer subtype, marital status                                                    | SMR                                       | SMR = 1.2 (95% CI: 1.1 – 2.1)  | Risk of suicide is increased by 20% in patients diagnosed with testis cancer                                                                                                                                                                      |
| Zhou [24]   | 2018 | Estimate the trend of suicide rate and identify the high-risk group of NSCLC patients                                                                                                        | SEER | 1973-2013 | Patients diagnosed with non-small cell lung cancer between 1973-2013 | US general Population                          | United States | Sex; Age; Race; Time; Geography; Other: Marital status, site, grade, histology, stage, treatment received | SMR                                       | Overall not reported           | Male, unmarried, and elderly patients were at higher risk of suicide mortality                                                                                                                                                                    |
| Turaga [74] | 2011 | Identify the suicide rate among patients with pancreatic cancer, using population-based data to identify patient, disease, and therapy characteristics associated with commission of suicide | SEER | 1995-2005 | Patients with pancreatic adenocarcinoma                              | US general population                          | United States | Sex; Age; Race; Time; Other: Marital status, disease stage, treatment received                            | SMR, cause-specific mortality for suicide | SMR = 10.8, 95% CI: 9.2 – 12.7 | Male patients with pancreatic adenocarcinoma have a risk of suicide nearly 11 times that of the general population. Patients who undergo an operative intervention are more likely to commit suicide, generally in the early postoperative period |

|                   |      |                                                                                                |                            |           |                                                                     |                            |               |                                                                                                                                                                        |                                                           |                                                                    |                                                                                                                                                                                                                            |
|-------------------|------|------------------------------------------------------------------------------------------------|----------------------------|-----------|---------------------------------------------------------------------|----------------------------|---------------|------------------------------------------------------------------------------------------------------------------------------------------------------------------------|-----------------------------------------------------------|--------------------------------------------------------------------|----------------------------------------------------------------------------------------------------------------------------------------------------------------------------------------------------------------------------|
| Yang [75]         | 2022 | Examine the risk of suicide among cancer survivors who developed a second malignant neoplasm   | SEER                       | 1975-2016 | Patients who developed a second malignant neoplasm during follow-up | US general population      | United States | Sex; Age; Race; Time; Geography; Other: Cohabitation status, insurance, tumor size and grade, treatment modality, lifestyle factors, site of second malignant neoplasm | HR, SMR                                                   | HR = 1.23, 95% CI: 1.14 – 1.31                                     | Compared with either patients with only a first malignant neoplasm or the general population, cancer survivors who received a second malignant neoplasm diagnosis were at increased risk of suicide death                  |
| Abdel-Rahman [40] | 2019 | Assess the socioeconomic predictors of suicide risk among cancer patients in the United States | SEER                       | 2000-2010 | Cancer patients diagnosed between 2000-2010                         | US general population      | United States | Sex; Age; Race; Other: Socioeconomic Status, tumor site, SEER stage, marital status, ethnicity                                                                         | Observed/Expected ratio for suicide among cancer patients | Overall not reported                                               | Cancer patients in socioeconomically vulnerable environments have higher suicide risk than other cancer patients                                                                                                           |
| Fang [76]         | 2009 | Explore whether suicide and cardiovascular events are affected by a prostate cancer diagnosis  | SEER, National Death Index | 1979-2004 | Patients with prostate cancer                                       | US general male population | United States | Age; Race; Time; Geography; Other: Marital status, county-level education, county-level poverty, tumor grade, tumor stage                                              | SMR                                                       | SMR during the first year after diagnosis = 1.4, 95% CI: 1.2 – 1.6 | There was an increased risk of suicide and cardiovascular death among men who were newly diagnosed with prostate cancer. The excess risks were higher in periods closer to cancer diagnosis and in earlier calendar years. |
| Saad [77]         | 2020 | Investigate the increase in suicide rate associated with diagnosis with brain cancer           | SEER                       | 2000-2016 | Patients diagnosed with brain cancers                               | US general population      | United States | Sex; Age; Race; Other: Marital status, tumor histology                                                                                                                 | Observed to expected event ratio                          | First year observed/expected = 3.05 (2.04 – 4.37)                  | Diagnosis with brain cancer is associated with an increased risk of suicide within the first year following diagnosis.                                                                                                     |

|               |      |                                                                                                                               |      |           |                                                                                                                                                                                                                                                                                                                                                                                    |                       |               |                                                                                                               |                            |                                 |                                                                                                                                                                                                                                                                                                     |
|---------------|------|-------------------------------------------------------------------------------------------------------------------------------|------|-----------|------------------------------------------------------------------------------------------------------------------------------------------------------------------------------------------------------------------------------------------------------------------------------------------------------------------------------------------------------------------------------------|-----------------------|---------------|---------------------------------------------------------------------------------------------------------------|----------------------------|---------------------------------|-----------------------------------------------------------------------------------------------------------------------------------------------------------------------------------------------------------------------------------------------------------------------------------------------------|
| Sugawara [22] | 2016 | Examine the rate of suicide in patients with gastric cancer and to identify factors associated with increased risk of suicide | SEER | 1998-2011 | Patients diagnosed with gastric cancer, and who had one of the following histologic types: 'carcinoma, not otherwise specified (NOS)', 'adenocarcinoma NOS', 'adenocarcinoma intestinal type', 'carcinoma, diffuse type', 'tubular adenocarcinoma', 'adenocarcinoma with mixed subtypes', 'papillary adenocarcinoma, NOS', 'mixed cell adenocarcinoma', 'mucinous adenocarcinoma', | US general population | United States | Sex; Age; Race; Time; Other: Marital status, extent of disease, tumor grade and histology, treatment received | SMR, incidence rate ratios | SMR = 4.07, 95% CI: 3.18 – 5.13 | Patients with gastric cancer have a higher risk of suicide than the general US population. The rate of suicide is highest within the first 3 months after diagnosis. Male sex, White race, unmarried status, and distant stage disease are significantly associated with increased risk of suicide. |
|---------------|------|-------------------------------------------------------------------------------------------------------------------------------|------|-----------|------------------------------------------------------------------------------------------------------------------------------------------------------------------------------------------------------------------------------------------------------------------------------------------------------------------------------------------------------------------------------------|-----------------------|---------------|---------------------------------------------------------------------------------------------------------------|----------------------------|---------------------------------|-----------------------------------------------------------------------------------------------------------------------------------------------------------------------------------------------------------------------------------------------------------------------------------------------------|

|               |      |                                                                                                                                                                                                                                                                                                                          |      |           |                                                   |                                                                            |               |                                                                                                                            |     |                                                                 |                                                                                                                                                                                                                                                                                                                                                                                                                                                                                                                                                                                            |
|---------------|------|--------------------------------------------------------------------------------------------------------------------------------------------------------------------------------------------------------------------------------------------------------------------------------------------------------------------------|------|-----------|---------------------------------------------------|----------------------------------------------------------------------------|---------------|----------------------------------------------------------------------------------------------------------------------------|-----|-----------------------------------------------------------------|--------------------------------------------------------------------------------------------------------------------------------------------------------------------------------------------------------------------------------------------------------------------------------------------------------------------------------------------------------------------------------------------------------------------------------------------------------------------------------------------------------------------------------------------------------------------------------------------|
| Siracuse [78] | 2017 | Determine (1) the incidence of suicide in patients with bone and soft tissue cancer, (2) whether the incidence of suicide is greater in patients with bone and soft tissue cancer than it is in the general US population, and (3) any demographic and tumor characteristics associated with increased suicide incidence | SEER | 1973-2013 | Patients with a primary bone or soft tissue tumor | National Center for Health Statistics of the US Census Bureau through SEER | United States | Sex; Age; Race; Time; Other: Marital status, stage at presentation, years since diagnosis, treatment received, cancer site | SMR | First 5 years since diagnosis SMR = 10.75, 95% CI: 9.19 – 12.61 | The suicide incidence in the population with bone and soft tissue cancer was more than twice that of the general US population. Compared with subpopulations examined in other studies, the suicide incidence of patients with bone and soft tissue cancer ranked below the incidence of suicide in patients with cancer of the lung and bronchus, stomach, oral cavity and pharynx, larynx, and ovary. Higher suicide incidences were seen in men, patients of white race, patients who had cancer of the pelvis or vertebral column, and patients within the first 5 years of diagnosis. |
|---------------|------|--------------------------------------------------------------------------------------------------------------------------------------------------------------------------------------------------------------------------------------------------------------------------------------------------------------------------|------|-----------|---------------------------------------------------|----------------------------------------------------------------------------|---------------|----------------------------------------------------------------------------------------------------------------------------|-----|-----------------------------------------------------------------|--------------------------------------------------------------------------------------------------------------------------------------------------------------------------------------------------------------------------------------------------------------------------------------------------------------------------------------------------------------------------------------------------------------------------------------------------------------------------------------------------------------------------------------------------------------------------------------------|

|           |      |                                                                                                                                                                                     |      |           |                                                                                                                                                                                                                             |                       |               |                                                                                                                    |                                                         |                                 |                                                                                                                                                                                                                                              |
|-----------|------|-------------------------------------------------------------------------------------------------------------------------------------------------------------------------------------|------|-----------|-----------------------------------------------------------------------------------------------------------------------------------------------------------------------------------------------------------------------------|-----------------------|---------------|--------------------------------------------------------------------------------------------------------------------|---------------------------------------------------------|---------------------------------|----------------------------------------------------------------------------------------------------------------------------------------------------------------------------------------------------------------------------------------------|
| Ma [36]   | 2021 | Determine the suicide risk among patients with a primary solid tumor while identifying coincident patterns with high suicide risk according to the area-based socioeconomic status. | SEER | 1975-2016 | Patients with a primary solid tumor: brain, breast, colorectum, esophagus, kidney, larynx, liver, lung/bronchus, melanoma/skin, oral cavity, pancreas, prostate, small intestine, stomach, testis, thyroid, urinary bladder | N/A                   | United States | Sex; Age; Race; Other: Cancer stage, grade, insurance status, marital status, community-level socioeconomic status | Cox-proportional hazards model                          | Overall not reported            | The risk of suicide death was significantly higher among adult patients with a primary solid tumor who were older, male, white, had not received active treatment, had no insurance, had high levels of cancer severity, and were unmarried. |
| Chen [37] | 2020 | Calculate the suicide rate and standardized mortality ratios and potential risk factors associated with suicide among hepatocellular carcinoma patients.                            | SEER | 1975-2016 | Patients with hepatocellular carcinoma                                                                                                                                                                                      | US general Population | United States | Sex; Age; Race; Time; Geography; Other: Marital status, Cancer stage, cancer treatments received                   | Suicide rate (# observed per 100,000 person years), SMR | SMR = 2.26, 95% CI: 1.78 – 2.84 | Suicide rate among hepatocellular carcinoma patients was higher than in the general population. Earlier year of diagnosis, male sex, older age of diagnosis, white race were predictors of suicide.                                          |

|           |      |                                                                                                                                                                                                          |      |           |                                          |                       |               |                                                                                                                                                                         |                             |                                 |                                                                                                                                                                                                                                                                                                                                                                                                                                                                                                 |
|-----------|------|----------------------------------------------------------------------------------------------------------------------------------------------------------------------------------------------------------|------|-----------|------------------------------------------|-----------------------|---------------|-------------------------------------------------------------------------------------------------------------------------------------------------------------------------|-----------------------------|---------------------------------|-------------------------------------------------------------------------------------------------------------------------------------------------------------------------------------------------------------------------------------------------------------------------------------------------------------------------------------------------------------------------------------------------------------------------------------------------------------------------------------------------|
| Horn [79] | 2020 | Assess the risk of death from a primary cancer diagnosis versus competing causes of death and characterize the relative risk of death after a pediatric cancer diagnosis versus the general population   | SEER | 1980-2015 | Pediatric patients diagnosed with cancer | US general population | United States | Sex; Age; Race; Time; Other: Cause of death                                                                                                                             | Risk of death by cause, SMR | Overall not reported            | The risk of mortality for pediatric patients with cancer was significantly higher than the risk for the general population and certain noncancerous causes of mortality presented a particularly increased risk. The SMRs for all causes of death were generally highest within the first 5 years after diagnosis, although the risks remained significantly increased up to 30 years after the initial diagnosis, in particular for cardiovascular disease, suicide, infections, and accidents |
| Chen [10] | 2021 | Measure suicide rates and standardized mortality rates among esophageal cancer patients in comparison with the United States general population and recognize underlying factors associated with suicide | SEER | 1975-2016 | Esophageal cancer patients               | US general population | United States | Sex; Age; Race; Time; Other: Primary site (within esophagus), histologic grade, marital status, SEER disease stage, treatments received, survival months post-diagnosis | SMR                         | SMR = 5.45, 95% CI: 4.66 – 6.35 | Suicide rates among patients with esophageal cancer were greater than in the general U.S. population, especially in men, older people, and patients not receiving chemotherapy or surgery.                                                                                                                                                                                                                                                                                                      |

|                 |      |                                                                                                                                                                   |      |           |                                                                                       |                        |               |                                                                                                                                                                                            |                                                |                                 |                                                                                                                                                                                                                                                                                                          |
|-----------------|------|-------------------------------------------------------------------------------------------------------------------------------------------------------------------|------|-----------|---------------------------------------------------------------------------------------|------------------------|---------------|--------------------------------------------------------------------------------------------------------------------------------------------------------------------------------------------|------------------------------------------------|---------------------------------|----------------------------------------------------------------------------------------------------------------------------------------------------------------------------------------------------------------------------------------------------------------------------------------------------------|
| Yu [30]         | 2012 | Study non-cancer-related mortality rates over time and examine the possible causes for several major deaths in patients with oral cavity and oropharyngeal cancer | SEER | 1973-2007 | Patients with primary malignant oral cavity and oropharyngeal cancer                  | N/A                    | United States | Sex; Age; Race; Time; Other: Marital status, tumor stage, treatment received, tumor site, ethnicity                                                                                        | SMR, risk ratios                               | SMR = 7.8, 95% CI: 4.6 – 12.4   | Suicide rates among patients with oral cavity and oropharyngeal cancer have significantly increased over the past 3 decades.                                                                                                                                                                             |
| Gaitanidis [26] | 2017 | Identify the trends in the incidence of suicide mortality among breast cancer in the United States over the past decades and associated risk factors              | SEER | 1973-2013 | Patients with a breast cancer diagnosis who died of any cause                         | N/A                    | United States | Sex; Age; Race; Time; Geography; Other: Marital status, treatment received, cancer grade, cancer stage, cancer type, time since diagnosis                                                  | Chi-Squared, Multivariable logistic regression | Overall not reported            | Younger age, male sex, nonwhite-nonblack race, single or separated/divorced/widowed marital status, cancer-directed surgery, lower tumor grade, earlier disease stage, progesterone receptor positivity, and shorter period elapsed from diagnosis were independent risk factors for committing suicide. |
| Shen [80]       | 2020 | To define the suicide rate and explore potential risk factors related to suicide in patients with Kaposi's Sarcoma by using SEER database                         | SEER | 1980-2016 | Patients with Kaposi's Sarcoma older than 18 years from the SEER database (1980–2016) | US general population. | United States | Sex; Age; Race; Other: Year of diagnosis<br>Marital status<br>Tumor risk classification<br>surgery (yes, no, unknown)<br>radiotherapy (yes, no, unknown)<br>chemotherapy (yes, no/unknown) | SMR                                            | SMR = 7.64, 95% CI: 6.28 – 9.21 | There is a higher suicide rate in Kaposi's sarcoma patients than the general population. Black race, advanced age of diagnosis, and chemotherapy were protective factors for suicide among Kaposi's sarcoma patients.                                                                                    |



|               |      |                                                                                                                                                                                                                                                                                                                                                      |                                                                 |           |                                                                    |                       |               |                                                                                                                                                                                                                                                |                                                          |                                 |                                                                                                                                                                                                                                                                                                                       |
|---------------|------|------------------------------------------------------------------------------------------------------------------------------------------------------------------------------------------------------------------------------------------------------------------------------------------------------------------------------------------------------|-----------------------------------------------------------------|-----------|--------------------------------------------------------------------|-----------------------|---------------|------------------------------------------------------------------------------------------------------------------------------------------------------------------------------------------------------------------------------------------------|----------------------------------------------------------|---------------------------------|-----------------------------------------------------------------------------------------------------------------------------------------------------------------------------------------------------------------------------------------------------------------------------------------------------------------------|
| Ma [9]        | 2022 | Determine the suicide rate of pancreatic cancer patients from 2000 to 2018 in the U.S., compared with the general population in different demographic and clinicopathological subgroups, identify factors that potentially increase suicide risk, and provide research evidence for reducing the risk of suicide in patients with pancreatic cancer. | SEER                                                            | 2000-2018 | Patients with pancreatic cancer                                    | US general population | United States | Sex; Age; Race; Time; Other: Cancer type, cancer stage, treatment received                                                                                                                                                                     | Suicide rates (# observed per 100,000 person-years), SMR | SMR = 6.43, 95% CI: 5.49 – 7.37 | Patients with pancreatic cancer had an elevated risk of suicide compared to the general US population. Male sex, white race, unmarried status, and diagnosis of pancreatic adenocarcinoma was associated with higher risk of suicide, while cancer-directed surgery and chemotherapy were associated with lower risk. |
| Aboumrad [71] | 2018 | Gain a better understanding of health system factors that may contribute to suicide in patients with cancer and identify potential strategies for care teams to address this using root cause analysis method for adverse events                                                                                                                     | National Center for Patient Safety Root Cause Analysis database | 2002-2017 | Patients with cancer treated in the Veterans Health Administration | N/A                   | United States | Sex; Age; Other: stage in care, cancer type, pre-existing mental health problems, health complications, stressors, time since last medical visit, location of last visit, type of last visit, mental health referral status, method of suicide | Root cause of suicide                                    | Overall not reported            | The majority of suicides occurred within 7 days since the last medical visit, the main primary cancer types were prostate and lung, the main suicide method was firearm, suicides happened during palliative care or upon diagnosis, most patients were not referred to mental health services                        |

|             |      |                                                                                                                                                                                                                                                                                   |      |           |                                                                                    |                       |               |                                                                                               |     |                                                                                              |                                                                                                                                                                                                                                                       |
|-------------|------|-----------------------------------------------------------------------------------------------------------------------------------------------------------------------------------------------------------------------------------------------------------------------------------|------|-----------|------------------------------------------------------------------------------------|-----------------------|---------------|-----------------------------------------------------------------------------------------------|-----|----------------------------------------------------------------------------------------------|-------------------------------------------------------------------------------------------------------------------------------------------------------------------------------------------------------------------------------------------------------|
| Barnes [81] | 2022 | Assess whether individuals with a childhood cancer diagnosis are at increased risk for suicide with an emphasis on potential changes in suicide risk by attained age, and examine associations between sociodemographic and cancer diagnosis risk factors and the risk of suicide | SEER | 1975-2016 | Individuals diagnosed with a first primary malignancy at the ages of 0 to 19 years | US general population | United States | Sex; Age; Race; Time; Geography; Other: Ethnicity, cancer site, stage at diagnosis            | SMR | Overall SMR = 1.14, 95% CI: 0.91 – 1.43.<br>Beyond 28 years: SMR = 1.40, 95% CI: 1.02 – 1.87 | There may be a significantly elevated risk of suicide for long-term survivors of a childhood cancer diagnosis                                                                                                                                         |
| Guo [82]    | 2019 | Characterize the suicide rates and SMRs among kidney cancer patients and identify the potential risk factors relevant to suicide based on the SEER database                                                                                                                       | SEER | 1973-2015 | People diagnosed with kidney cancer                                                | US general population | United States | Sex; Age; Race; Time; Other: Marital status, cancer stage, cancer subtype, treatment received | SMR | SMR = 1.83, 95% CI: 1.59 – 2.10                                                              | Patients with kidney cancer had an increased risk of suicide compared to the general US population. Earlier year of diagnosis, black race, higher histologic grade, and cancer-directed surgery not performed were significant predictors of suicide. |

|            |      |                                                                                                                                                                                                                 |      |           |                                                                                                                                                                                                              |                       |               |                                                                                                                                                                                   |     |                                 |                                                                                                                                                                                                                                                                                                      |
|------------|------|-----------------------------------------------------------------------------------------------------------------------------------------------------------------------------------------------------------------|------|-----------|--------------------------------------------------------------------------------------------------------------------------------------------------------------------------------------------------------------|-----------------------|---------------|-----------------------------------------------------------------------------------------------------------------------------------------------------------------------------------|-----|---------------------------------|------------------------------------------------------------------------------------------------------------------------------------------------------------------------------------------------------------------------------------------------------------------------------------------------------|
| Urban [25] | 2013 | Explore whether demographic, disease, and treatment variables can be used to identify subgroups of patients with lung cancer with differing risks of suicide in a large, US cohort of patients with lung cancer | SEER | 1973-2009 | All patients with cancer with malignant behavior of the lung and bronchus, excluding cases where the age was not known or the histology was not compatible with either a lung cancer primary or mesothelioma | US general population | United States | Sex; Age; Race; Time; Geography; Other: Treatment received, poverty and education levels, marital status, primary tumors (single vs. multiple), cancer stage, type of lung cancer | SMR | SMR = 4.95, 95% CI: 4.68 – 5.24 | All patients with lung cancer have an excess risk of suicide immediately after diagnosis. However, while those with poorer prognoses have a greater risk.                                                                                                                                            |
| Guo [83]   | 2022 | Establish an association between causes of death and demographics in prostate cancer and compare risk of causes of death with the general US population                                                         | SEER | 2000-2016 | Patients with prostate cancer                                                                                                                                                                                | US general population | United States | Age; Race; Time; Other: Cancer stage and grade, treatment received, survival time                                                                                                 | SMR | SMR = 0.97, 95% CI: 0.92 – 1.02 | The risk of death from non-cancer causes within 5 years of prostate cancer diagnosis was significantly higher for infectious diseases, septicemia, and suicide. However, the overall risk of suicide death was not different among prostate cancer patients as compared to the general US population |

|               |      |                                                                                                                                                                                                                                                                                                                                                      |      |           |                                                                                                  |                         |               |                                                                               |                                     |                                 |                                                                                                                                                                                                                                                                                                                                                 |
|---------------|------|------------------------------------------------------------------------------------------------------------------------------------------------------------------------------------------------------------------------------------------------------------------------------------------------------------------------------------------------------|------|-----------|--------------------------------------------------------------------------------------------------|-------------------------|---------------|-------------------------------------------------------------------------------|-------------------------------------|---------------------------------|-------------------------------------------------------------------------------------------------------------------------------------------------------------------------------------------------------------------------------------------------------------------------------------------------------------------------------------------------|
| Saad [77]     | 2019 | Assess the risk of suicide within the first year after a cancer diagnosis, to determine whether the incidence of suicide in patients with cancer is greater than the incidence in the normal population in the United States, and to determine whether there is any association between demographics or tumor characteristics and suicidal incidence | SEER | 2000-2014 | Patients with cancer                                                                             | US general population   | United States | Sex; Age; Race; Other: Marital status, stage, cancer site, cancer type        | Observed/expected ratio for suicide | O/E = 2.52, 95% CI: 2.39 – 2.64 | The risk of suicide increases significantly within the first year after a diagnosis of cancer in comparison with the general population. The risk of suicide is specifically higher after a diagnosis of pancreatic, lung, or colorectal cancer, whereas a diagnosis of breast or prostate cancer does not result in an increased suicide risk. |
| Anderson [84] | 2018 | Investigate suicide rates among patients with cancers of the digestive system compared to the general population and examine whether suicide rates are higher in subgroups by site, stage, time since diagnosis, patient characteristics                                                                                                             | SEER | 2000-2014 | Patients with digestive system tumors: esophagus, colon, rectum, liver, pancreas, stomach, other | U.S. general population | United States | Sex; Age; Race; Other: Cancer site, marital status, Stage, Surgical treatment | SMR                                 | SMR=1.91, 95% CI: 1.79 - 2.04   | All cancer sites had significantly higher suicide rates than the general population. The highest standardized mortality ratios were for esophageal, pancreatic, stomach, and liver cancers.                                                                                                                                                     |

|           |      |                                                                                                                                                                                                                                                                                                                 |      |           |                                                                                                                                                                                 |                       |               |                                                                                                               |                                                        |                                 |                                                                                                                                                                                                                                                                            |
|-----------|------|-----------------------------------------------------------------------------------------------------------------------------------------------------------------------------------------------------------------------------------------------------------------------------------------------------------------|------|-----------|---------------------------------------------------------------------------------------------------------------------------------------------------------------------------------|-----------------------|---------------|---------------------------------------------------------------------------------------------------------------|--------------------------------------------------------|---------------------------------|----------------------------------------------------------------------------------------------------------------------------------------------------------------------------------------------------------------------------------------------------------------------------|
| Yang [85] | 2019 | To identify the incidence of and risk factors for suicide death in male genital-system cancer patients in the United States.                                                                                                                                                                                    | SEER | 2004-2015 | Male genital-system cancer (MSGC) patients older than 18, excluding cases without a diagnosis, or microscopic confirmation, only with autopsy findings, or incomplete variables | N/A                   | United States | Sex; Age; Race; Time; Other: Marital status, primary site, cancer stage, treatment received, insurance status | Univariate and multivariate logistic regression models | Overall not reported            | MSGC patients of younger age, being unmarried, being DSW (divorced, separated, or widowed), and no/unknown surgery significantly increased the risk of suicide death. Importantly, a time of <1 year after the diagnosis was related to an increased risk of suicide death |
| Chen [86] | 2022 | Determine the relative risk of suicide and accidental deaths among ovarian cancer patients compared with the general population and to identify demographic and tumor-related characteristics that are associated with a particularly high risk of suicide and accidental deaths among ovarian cancer patients. | SEER | 1973-2016 | Patients with primary ovarian cancer                                                                                                                                            | US general population | United States | Age; Race; Time; Geography; Other: Education, income, tumor grade, stage, treatment received                  | Relative risk for death by suicide or accidental death | SMR = 1.86, 95% CI: 1.54 – 2.25 | Risk of suicide and accidental death was higher among women with ovarian cancers compared with the general US population                                                                                                                                                   |

|              |      |                                                                                                                                                                                                                                                                                                         |      |           |                                                                                      |                       |               |                                                                                                                                                                                                                                                     |                                                                                                     |                                 |                                                                                                                                                                                                                                             |
|--------------|------|---------------------------------------------------------------------------------------------------------------------------------------------------------------------------------------------------------------------------------------------------------------------------------------------------------|------|-----------|--------------------------------------------------------------------------------------|-----------------------|---------------|-----------------------------------------------------------------------------------------------------------------------------------------------------------------------------------------------------------------------------------------------------|-----------------------------------------------------------------------------------------------------|---------------------------------|---------------------------------------------------------------------------------------------------------------------------------------------------------------------------------------------------------------------------------------------|
| Rahouma [31] | 2018 | Analyze suicide rates among cancer patients in the United States relative to the general US population, aiming to classify types of cancers according to the risk of suicide, in order to help prioritize the implementation of survivorship plans and to guide discussion and counselling of patients. | SEER | 2018      | Cancer patients diagnosed between 1973 and 2013                                      | US general population | United States | Sex; Age; Race                                                                                                                                                                                                                                      | SMR                                                                                                 | SMR = 1.57, 95% CI: 1.53 – 1.61 | The highest suicide risk was observed in patients with lung cancer, followed by colorectal, breast, and prostate cancer.                                                                                                                    |
| Samawi [87]  | 2017 | Examine the incidence and predictors of suicide for patients with rectal cancer and with colon cancer.                                                                                                                                                                                                  | SEER | 1973–2009 | Adult patients with confirmed adenocarcinoma of the colon or rectum during 1973–2009 |                       | United States | Sex; Age; Race; Other: marital status (single, married, or unknown status primary tumour site (colon vs. rectum), stage at diagnosis (local or regional vs. distant), number of primary tumours, whether surgery to the primary site was performed. | Kaplan–Meier survival analysis, multivariate adjusted Cox proportional hazards regression were used | HR = 1.05, 95% CI: 0.83 – 1.33  | The suicide risk in CRC patients is low (<0.2%), and no difference was found based on location of the primary tumor. Sex, age, distance spread of disease, and intact primary tumor were the main predictors of suicide among CRC patients. |

|                     |      |                                                                                                                                                                                                                                                                                                                      |      |           |                                                                            |                       |               |                                                                                                                                |                       |                               |                                                                                                                                                                                                             |
|---------------------|------|----------------------------------------------------------------------------------------------------------------------------------------------------------------------------------------------------------------------------------------------------------------------------------------------------------------------|------|-----------|----------------------------------------------------------------------------|-----------------------|---------------|--------------------------------------------------------------------------------------------------------------------------------|-----------------------|-------------------------------|-------------------------------------------------------------------------------------------------------------------------------------------------------------------------------------------------------------|
| Zhang [88]          | 2021 | Develop and validate a risk assessment model to predict the probability of suicide within 5 years after the diagnosis of lung cancer                                                                                                                                                                                 | SEER | 2007-2016 | Lung cancer patients diagnosed between 2007 to 2016                        | US general population | United States | Sex; Age; Other: marital status, grade, histology, stage, treatment received                                                   | Nomogram, risk matrix | C-index = 0.77                | Demographic information such as sex and marital status, and clinical factors including tumour grade and treatment history of surgery, radiation and chemotherapy were important predictors of suicide risk. |
| Yu [89]             | 2021 | Determine whether patients with primary malignant bone tumors are at a higher risk of suicide and accidental death than the general population and identify the demographic and tumor-related characteristics and type of surgery associated with a higher risk of suicide and accidental death among these patients | SEER | 1973-1975 | Patients with primary malignant bone tumors diagnosed between 1973 to 1975 | US general population | United States | Sex; Age; Race; Time; Other: Primary site, clinical stage                                                                      | SMR                   | SMR = 2.17, 95% CI: 1.80-2.62 | Patients with primary malignant bone tumors had a higher risk of suicide and accidental death than the general population in the United States                                                              |
| Osazuwa-Peters [90] | 2021 | To evaluate whether the risk of suicide among patients with HNC differs by rural vs. urban or metropolitan residence status                                                                                                                                                                                          | SEER | 2000-2016 | Patients with head-and-neck cancer                                         | US general population | United States | Sex; Age; Race; Geography; Other: Cancer site, marital status, county-level income, county-level education level, cancer stage | SMR                   | Overall not reported          | Suicide incidence is elevated for patients with head-and-neck cancer, particularly those living in rural areas                                                                                              |

|             |      |                                                                                                                                                                                                                     |      |           |                                                   |                                                                                                              |               |                                                                                                                                                                                                                                  |                                                                |                                                         |                                                                                                                                                                                                                                                                         |
|-------------|------|---------------------------------------------------------------------------------------------------------------------------------------------------------------------------------------------------------------------|------|-----------|---------------------------------------------------|--------------------------------------------------------------------------------------------------------------|---------------|----------------------------------------------------------------------------------------------------------------------------------------------------------------------------------------------------------------------------------|----------------------------------------------------------------|---------------------------------------------------------|-------------------------------------------------------------------------------------------------------------------------------------------------------------------------------------------------------------------------------------------------------------------------|
| Dalela [91] | 2015 | Delineate the demographic and tumor-related factors that impact the proclivity of suicide and accidental death in American men with prostate cancer                                                                 | SEER | 1988-2010 | Men diagnosed with adenocarcinoma of the prostate | Men with other solid cancers                                                                                 | United States | Age; Race; Time; Geography; Other: Time to suicide since diagnosis, type of primary treatment, definitive primary treatment, stage at diagnosis, marital status, county-level educational attainment, county-level family income | Risk of suicidal and accidental death                          | ARR = 3.98, 95% CI: 3.02 – 5.23                         | Men diagnosed with prostate cancer have a significantly higher risk of suicidal and accidental death within the first year of diagnosis than their counterparts diagnosed with other solid cancers.                                                                     |
| Barnes [81] | 2022 | Determine whether adoption of the Affordable Care Act was associated with suicide incidence in patients with cancer in the USA and isolate the association between state Medicaid expansions and suicide incidence. | SEER | 2011-2016 | Patients diagnosed with cancer                    | 18-64 year old patients vs. 65-74 year old patients, patients in Medicaid expansion vs. non-expansion states | United States | Sex; Age; Race; Other: Residence (metropolitan vs. non-metropolitan), County-level education, County-level income,                                                                                                               | Cumulative suicide incidence within 1 year of cancer diagnosis | Pre-ACA: Adjusted change = -6.14, 95% CI: -13.48 – 1.19 | There was no significant change in the incidence of suicide for 18–64-year-old patients with cancer after 2014, even in Medicaid expansion states. However, there was a significant decrease in suicide incidence after 2014 among 55–64-year-old patients with cancer. |



|          |      |                                                                                                                                                                   |            |           |                                                                                                                                                            |                       |               |                                                                                            |                                          |                                    |                                                                                                                                                                                                           |
|----------|------|-------------------------------------------------------------------------------------------------------------------------------------------------------------------|------------|-----------|------------------------------------------------------------------------------------------------------------------------------------------------------------|-----------------------|---------------|--------------------------------------------------------------------------------------------|------------------------------------------|------------------------------------|-----------------------------------------------------------------------------------------------------------------------------------------------------------------------------------------------------------|
| Kam [18] | 2015 | Examine suicide rates among patients with cancers of the head and neck                                                                                            | SEER       | 1973-2011 | Patients with head and neck cancer: nasal cavity, nasal sinuses, nasopharynx, oral cavity, oropharynx, salivary glands, hypopharynx, larynx, thyroid gland | US general population | United States | Sex; Race; Time; Other: Treatment received, cancer stage, cancer site                      | Suicide rate, SMR                        | SMR = 3.21, 95% CI: 2.18 – 4.23    | Suicide rates among patients with head and neck cancer are significantly higher than that of the general population. In particular, patients with hypopharyngeal and laryngeal cancer are at highest risk |
| Han [29] | 2021 | Examine trends in cancer-related suicides in comparison to trends in overall suicides and by high-risk subpopulations, including older, male, and rural residents | CDC WONDER | 1999-2018 | Cancer patients                                                                                                                                            | Overall suicide rate  | United States | Sex; Age; Race; Time; Geography; Other: Contributing causes (mental health, heart disease) | Age-adjusted cancer-related suicide rate | AAPC = -2.8 %, 95% CI: -3.5%– 2.1% | There was a decreasing trend of cancer-related suicide, in contrast to an increasing rate of overall suicides. The largest declines were among high-risk populations                                      |

|                     |      |                                                                                                                                                                                                                                                          |      |           |                                                                                                                                                                        |                                                                  |               |                                                                                                                                                                                                 |                     |                                 |                                                                                                                                                               |
|---------------------|------|----------------------------------------------------------------------------------------------------------------------------------------------------------------------------------------------------------------------------------------------------------|------|-----------|------------------------------------------------------------------------------------------------------------------------------------------------------------------------|------------------------------------------------------------------|---------------|-------------------------------------------------------------------------------------------------------------------------------------------------------------------------------------------------|---------------------|---------------------------------|---------------------------------------------------------------------------------------------------------------------------------------------------------------|
| Suk [8]             | 2021 | To examine whether the risks and patterns of suicide mortality among people with a cancer diagnosis differ by US county-level median income and rural or urban status                                                                                    | SEER | 2000-2016 | People diagnosed with a first primary malignant tumor, excluding those diagnosed from death certificates or autopsy and if ages at the times of diagnosis were unknown | Mortality data from the US National Center for Health Statistics | United States | Sex; Age; Race; Time; Geography; Other: Ethnicity, county-level rural and urban status, county-level income, educational level attainment, unemployment rate, and percentage of black residents | SMR                 | SMR = 1.41, 95% CI: 1.38 – 1.44 | There is higher suicide mortality following cancer diagnosis among people living in lower-income and rural counties.                                          |
| Osazuwa-Peters [20] | 2018 | Examine mortality rates from suicide among survivors of head-and-neck cancer and among survivors of cancer of other common sites, and to compare the risk of suicide among head-and-neck cancer survivors with the risk among survivors of other cancers | SEER | 2000-2014 | Patients with a first primary malignancy of the head and neck                                                                                                          | Survivors of other common cancers besides head-and-neck cancer   | United States | Sex; Age; Race; Other: Cancer site, marital status, cancer stage                                                                                                                                | Adjusted Risk Ratio | ARR = 1.97, 95% CI: 1.77 – 2.19 | Suicide risk was elevated in survivors of head-and-neck cancer compared with survivors of other major cancers                                                 |
| Zhou [50]           | 2019 | Analyze the necessity to separate adolescent and young adult cancer patients as a special group to identify high risk patients                                                                                                                           | SEER | 1973-2015 | Patients with solid malignancies                                                                                                                                       | US general population                                            | United States | Sex; Age; Race; Time; Other: Cancer type, marital status, tumor stage, treatment received                                                                                                       | SMR                 | Overall not reported            | Male sex, white race, unmarried status, earlier stage and later time from cancer diagnosis are suicide risk factors for both AYA and all-age cancer patients. |

|                   |      |                                                                                                                                                                                                                                                                                                                                                                                                   |      |           |                                                                         |                           |               |                                                                                                                                         |                                                             |                                               |                                                                                                                                                                                                                 |
|-------------------|------|---------------------------------------------------------------------------------------------------------------------------------------------------------------------------------------------------------------------------------------------------------------------------------------------------------------------------------------------------------------------------------------------------|------|-----------|-------------------------------------------------------------------------|---------------------------|---------------|-----------------------------------------------------------------------------------------------------------------------------------------|-------------------------------------------------------------|-----------------------------------------------|-----------------------------------------------------------------------------------------------------------------------------------------------------------------------------------------------------------------|
| Jayakrishnan [92] | 2015 | Understand the effect of surgical morbidity on risk of suicide among patients with solid tumors and to examine the impact of cancer prognosis on this interaction.                                                                                                                                                                                                                                | SEER | 2004-2011 | Patients diagnosed with stage II-III cancer undergoing curative surgery | US general population     | United States | Sex; Age; Race; Other: Cancer type, surgical morbidity, cancer prognosis, marital status                                                | Incidence rates, odds ratios, and hazard ratios for suicide | Incidence rate = 16.58, 95% CI: 14.54 – 18.82 | Patients undergoing surgeries of high morbidity are more likely to commit suicide even after adjusting for the prognosis of disease. Single, elderly men undergoing such surgeries are particularly vulnerable. |
| Heynemann [93]    | 2021 | Investigate clinical and demographic factors associated with death by suicide among adolescents and young adults with cancer compared to US population normative data and other adolescents and young adult individuals with cancer. Characterize suicide mortality among adolescent and young adult (AYA) patients in the US and identify risk factors associated with a higher risk of suicide. | SEER | 1975-2016 | Adolescents and young adults (15-39 years) with cancer                  | US general population     | United States | Sex; Age; Race; Time; Other: Cancer site, treatment received, cancer grade, cancer stage, number of primary tumors, relationship status | SMR, odds ratios                                            | SMR = 34.1, 95% CI: 31.4–36.9.                | Adolescents and young adults with cancer were 34 times more likely than the general population to have died by suicide.                                                                                         |
| Yang [94]         | 2021 | Characterize suicide mortality among adolescent and young adult (AYA) patients in the US and identify risk factors associated with a higher risk of suicide.                                                                                                                                                                                                                                      | SEER | 1973-2015 | AYAs and older adults with cancer                                       | US general AYA population | United States | Sex; Age; Race; Time; Other: Marital status, stage of cancer, cancer site, cause of death, number of primary tumors                     | SMR                                                         | SMR = 1.234, 95% CI: 1.159 – 1.313            | The incidence of suicide in AYA patients with cancer in the US was approximately 23.4% higher than that of the general US population.                                                                           |

|           |      |                                                                                                                                                                                                                              |      |           |                                                       |         |               |                                                                                                                                  |                                                        |                                |                                                                                                                                                                                                                                                                                                                                                                                                                                                                          |
|-----------|------|------------------------------------------------------------------------------------------------------------------------------------------------------------------------------------------------------------------------------|------|-----------|-------------------------------------------------------|---------|---------------|----------------------------------------------------------------------------------------------------------------------------------|--------------------------------------------------------|--------------------------------|--------------------------------------------------------------------------------------------------------------------------------------------------------------------------------------------------------------------------------------------------------------------------------------------------------------------------------------------------------------------------------------------------------------------------------------------------------------------------|
| Pham [95] | 2018 | Assess incidence of suicide in patients with colon and rectal malignancies, while expounding upon demographical, clinical, and diagnostic factors associated with suicide in this patient population                         | SEER | 1988-2010 | Patients diagnosed with colon and rectal malignancies | WISQARS | United States | Sex; Age; Race; Other: Income, marital status, and clinical variables                                                            | Contin-gency tables, mortality ratios, and odds ratios | OR = 1.53, 95% CI: 1.13 – 1.33 | Race and gender appear to influence suicide rates in patients with colorectal cancer. Females with colorectal cancer demonstrated approximately four times the suicide rate of the gender-matched population. Also, the research indicates that suicide incidence is a factor in this diagnosis without preference for stage or sub-type. The increased suicide risk in patients with CRC does not seem to be associated with poor prognosis or likelihood of mortality. |
| Fu [96]   | 2021 | Examine the suicide rates among childhood cancer survivors in the US and to determine characteristics that are associated with higher suicide risk, as well as the trend of suicide rates over age and years after diagnosis | SEER | 1975-2016 | Survivors of pediatric cancer                         | N/A     | United States | Sex; Age; Race; Time; Other: Median household income, Normalized cost-of-living index, Cancer site, Surgery received (yes or no) | Frequency of suicide death                             | Overall not reported           | Most suicides occurred after the age of 15. Suicide was particularly a problem for survivors with thyroid cancer.                                                                                                                                                                                                                                                                                                                                                        |

|              |      |                                                                                                   |      |           |                             |                                        |               |                                                                                                                                                     |                                                                  |                               |                                                                                                                                                                                                                                                          |
|--------------|------|---------------------------------------------------------------------------------------------------|------|-----------|-----------------------------|----------------------------------------|---------------|-----------------------------------------------------------------------------------------------------------------------------------------------------|------------------------------------------------------------------|-------------------------------|----------------------------------------------------------------------------------------------------------------------------------------------------------------------------------------------------------------------------------------------------------|
| Bowden [21]  | 2017 | Examine suicide incidence and associated factors in gastric cancer patients                       | SEER | 1973-2013 | Gastric cancer patients     | US general population                  | United States | Sex; Age; Race; Other: Time since diagnosis                                                                                                         | SMR                                                              | SMR = 3.21, 95% CI: 2.80-3.67 | Patients with gastric cancer have a higher rate of suicide compared to the general U.S. population. Female gender, White race, age ≤39 years, and age 70–79 years are factors associated with increased risk of suicide in patients with gastric cancer. |
| Simpson [97] | 2018 | Investigate the risk of suicide in patients with penile cancer                                    | SEER | 1973-2013 | Patients with penile cancer | US general population                  | United States | Age; Race; Other: Marital status, tumor grade, treatment received                                                                                   | SMR, suicide rates (number of suicides/person-years of survival) | SMR = 1.58, 95% CI: 1.18-2.11 | Penile cancer does increase the risk for suicide compared with age-adjusted controls                                                                                                                                                                     |
| Du [38]      | 2021 | Examine the association between insurance status and risk of suicide mortality in cancer patients | SEER | 2007-2016 | Patients with cancer        | Insured vs. Any Medicaid vs. Uninsured | United States | Sex; Age; Race; Time; Other: Cancer type, county-level income, county-level unemployment rate, county-level education, cancer stage, marital status | Risk of suicide death                                            | Overall not reported          | Uninsured patients with cancer have a greater risk of suicide mortality than insured patients                                                                                                                                                            |

|                 |      |                                                                                                                                                    |      |           |                                                |                       |               |                                                                                                                |     |                                 |                                                                                                                                                                                                                                                                                                                                                                                                                                                                 |
|-----------------|------|----------------------------------------------------------------------------------------------------------------------------------------------------|------|-----------|------------------------------------------------|-----------------------|---------------|----------------------------------------------------------------------------------------------------------------|-----|---------------------------------|-----------------------------------------------------------------------------------------------------------------------------------------------------------------------------------------------------------------------------------------------------------------------------------------------------------------------------------------------------------------------------------------------------------------------------------------------------------------|
| Elshanbary [23] | 2021 | Identify the risk factors for suicide in patients with gastric adenocarcinoma                                                                      | SEER | 1975-2016 | Patients with gastric adenocarcinoma           | US general population | United States | Sex; Age; Race; Other: Marital status, primary cancer site, treatment received, cancer stage, insurance status | SMR | Overall not reported            | The risk of suicide mortality was higher among gastric adenocarcinoma patients than in the general US population. The risk of suicide was lower in female and Black patients. Among the patients dying from suicide and self-inflicted injury, those with lung and bronchus cancer had the highest Standardized Mortality Ratio                                                                                                                                 |
| Zaorsky [98]    | 2016 | Characterize the causes of death among cancer patients in the United States as a function of calendar year, patient age, and time after diagnosis. | SEER | 1973-2012 | Cancer patients diagnosed between 1973 to 2012 | US general population | United States | Age; Time; Other: Cancer type                                                                                  | SMR | Overall not reported            | within the first year, followed by breast cancer and testis cancer. Testis cancer patients, however, had the highest persistent risk of suicide and self-inflicted injury. Elderly, white, unmarried males with localized disease are at highest risk vs other cancer patients. Among those diagnosed at < 50 years of age, the plurality of suicides are from hematologic and testicular tumors; if > 50, from prostate, lung, and colorectal cancer patients. |
| Zaorsky [4]     | 2019 | Identify cancer patients at the highest risk of suicide compared to the general population and other cancer patients.                              | SEER | 1973-2014 | Cancer patients diagnosed between 1973-2014    | US general population | United States | Sex; Age; Race; Time; Other: Marital status, cancer stage, surgery status                                      | SMR | SMR = 4.44, 95% CI: 4.33 – 4.55 |                                                                                                                                                                                                                                                                                                                                                                                                                                                                 |
